# Supplementary material for: Molecular Initiating Events Associated with Drug-Induced Liver Malignant Tumors: An Integrated Study of the FDA Adverse Event Reporting System and Toxicity Predictions
Source: MDPI journal article supplement (doi:10.3390/biom11070944), 2021-06-25
Supplement: s1 [file s1]

**Table S1.** Signal-detected LMT-related indications.

| Indication                                 | Odds Ratio | 95% Confidence Interval | <i>p</i> -Value |
|--------------------------------------------|------------|-------------------------|-----------------|
| Hepatitis B                                | 40.94      | 28.89–58.02             | <.0001**        |
| Chronic hepatitis B                        | 38.53      | 21.87–67.88             | <.0001**        |
| Hepatic cirrhosis                          | 36.97      | 25.83–52.93             | <.0001**        |
| Liver transplant                           | 22.94      | 14.43–36.45             | <.0001**        |
| Chronic hepatitis C                        | 22.01      | 18.67–25.95             | <.0001**        |
| Prophylaxis against transplant rejection   | 13.79      | 8.80–21.61              | <.0001**        |
| Immunosuppressant drug therapy             | 13.52      | 5.82–31.39              | <.0001**        |
| Hepatitis C                                | 13.04      | 11.14–15.28             | <.0001**        |
| Fluid retention                            | 12.82      | 5.52–29.76              | <.0001**        |
| Liver disorder                             | 12.48      | 3.58–43.45              | 0.0179*         |
| Ascites                                    | 11.54      | 4.02–33.11              | 0.0038*         |
| Breakthrough pain                          | 11.47      | 3.30–39.93              | 0.0209*         |
| Carcinoid syndrome                         | 11.05      | 3.18–38.46              | 0.0224*         |
| Thrombocytopenia                           | 8.89       | 3.10–25.49              | 0.0077*         |
| Cardiovascular disorder                    | 8.68       | 3.43–21.97              | 0.0020*         |
| Cancer pain                                | 8.42       | 4.82–14.73              | <.0001**        |
| Immunosuppression                          | 7.17       | 3.09–16.6               | 0.0012*         |
| Hypokalaemia                               | 6.29       | 2.20–18.00              | 0.0193*         |
| Gastric ulcer                              | 5.75       | 2.48–13.30              | 0.0031*         |
| Pain management                            | 5.50       | 1.92–15.73              | 0.0272*         |
| Angina pectoris                            | 4.50       | 2.08–9.73               | 0.0038*         |
| Growth hormone deficiency                  | 4.35       | 1.52–12.44              | 0.0485*         |
| Psoriasis                                  | 3.35       | 2.58–4.35               | <.0001**        |
| Prophylaxis against gastrointestinal ulcer | 3.31       | 1.53–7.15               | 0.0156*         |
| Diabetes mellitus                          | 3.09       | 2.30–4.15               | <.0001**        |
| Type 2 diabetes mellitus                   | 2.73       | 2.12–3.51               | <.0001**        |
| Hyperlipidaemia                            | 2.67       | 1.56–4.57               | 0.0023*         |
| Dyspepsia                                  | 2.51       | 1.22–5.14               | 0.0336*         |
| Pulmonary arterial hypertension            | 2.42       | 1.62–3.61               | 0.0002*         |
| HIV infection                              | 2.01       | 1.25–3.21               | 0.0102*         |
| Constipation                               | 2.00       | 1.09–3.66               | 0.0480*         |
| Rheumatoid arthritis                       | 1.33       | 1.03–1.73               | 0.0421*         |

\*:  $p < 0.05$ , \*\*:  $p < 0.0001$ .

**Table S2.** Signal-detected LMT-related drugs.

| Drug                  | Odds Ratio | 95% Confidence Interval | p-Value  |
|-----------------------|------------|-------------------------|----------|
| Daclatasvir           | 77.73      | 62.60–96.52             | <.0001** |
| Asunaprevir           | 70.77      | 45.95–109               | <.0001** |
| Entecavir             | 48.25      | 31.19–74.66             | <.0001** |
| Cinnamomum cassia     | 35.89      | 13.96–92.27             | <.0001** |
| Adefovir              | 33.87      | 18.25–62.84             | <.0001** |
| Sofosbuvir            | 31.25      | 26.74–36.53             | <.0001** |
| Quinine               | 29.58      | 12.63–69.3              | <.0001** |
| Panax ginseng         | 28.15      | 11.00–72.08             | <.0001** |
| Atractylodes lancea   | 27.38      | 9.44–79.46              | 0.0003*  |
| Velpatasvir           | 26.52      | 16.86–41.69             | <.0001** |
| Poria cocos           | 25.50      | 9.97–65.19              | <.0001** |
| Telbivudine           | 24.82      | 10.62–58.01             | <.0001** |
| Potassium aspartate   | 21.56      | 6.14–75.70              | 0.0065*  |
| Docosahexaenoic acid  | 20.91      | 5.96–73.40              | 0.0069*  |
| Ledipasvir            | 20.90      | 15.8–27.63              | <.0001** |
| Glycyrrhiza spp.      | 19.88      | 7.80–50.66              | <.0001** |
| Glecaprevir           | 18.81      | 11.53–30.69             | <.0001** |
| Pibrentasvir          | 18.81      | 11.53–30.69             | <.0001** |
| Albiglutide           | 18.42      | 7.23–46.92              | 0.0001*  |
| Paritaprevir          | 17.42      | 13.15–23.08             | <.0001** |
| Ombitasvir            | 17.36      | 13.10–23.01             | <.0001** |
| Dasabuvir             | 15.70      | 11.43–21.57             | <.0001** |
| Cefcapene             | 14.06      | 4.03–49.10              | 0.0144*  |
| Levomefolic acid      | 13.10      | 3.75–45.70              | 0.0164*  |
| Tocopherol            | 12.08      | 4.76–30.65              | 0.0006*  |
| Bisacodyl             | 11.81      | 4.66–29.98              | 0.0007*  |
| Enterococcus faecalis | 11.64      | 3.34–40.59              | 0.0204*  |
| Mianserin             | 11.60      | 4.57–29.42              | 0.0007*  |
| Boceprevir            | 11.56      | 6.75–19.82              | <.0001** |
| Ribavirin             | 11.53      | 9.96–13.34              | <.0001** |
| Gliclazide            | 11.31      | 5.50–23.27              | <.0001** |
| Cysteine              | 11.27      | 3.23–39.28              | 0.0217*  |
| Elbasvir              | 10.80      | 4.65–25.07              | 0.0002*  |
| Grazoprevir           | 10.78      | 4.64–25.02              | 0.0002*  |
| Ursodeoxycholic acid  | 9.95       | 5.56–17.83              | <.0001** |
| Clostridium butyricum | 9.93       | 3.46–28.50              | 0.0058*  |
| Eicosapentaenoic acid | 9.89       | 3.45–28.40              | 0.0058*  |
| Tolvaptan             | 9.87       | 6.15–15.83              | <.0001** |
| Propranolol           | 9.40       | 5.25–16.84              | <.0001** |
| Glycyrrhizic acid     | 9.24       | 2.65–32.15              | 0.0311*  |
| Ritonavir             | 9.19       | 7.09–11.90              | <.0001** |
| Telotristat           | 8.78       | 2.52–30.53              | 0.0342*  |
| Etizolam              | 8.40       | 2.93–24.09              | 0.009*   |
| Calcitriol            | 8.19       | 2.36–28.49              | 0.0386*  |
| Rifaximin             | 7.97       | 3.44–18.48              | 0.0008*  |
| Valine                | 7.80       | 2.24–27.11              | 0.0422*  |
| Leucine               | 7.77       | 2.24–27.01              | 0.0425*  |
| Thiamine              | 7.64       | 4.03–14.50              | <.0001** |

\*:  $p < 0.05$ , \*\*:  $p < 0.0001$ .

**Table S2.** Signal-detected LMT-related drugs (continued).

| Drug                  | Odds Ratio | 95% Confidence Interval | p-Value  |
|-----------------------|------------|-------------------------|----------|
| Amino acids nos       | 7.56       | 2.64–21.66              | 0.012*   |
| Isoleucine            | 7.52       | 2.16–26.13              | 0.045*   |
| Ustekinumab           | 7.45       | 4.58–12.12              | <.0001** |
| Peginterferon alfa-2b | 7.24       | 5.30–9.89               | <.0001** |
| Alogliptin            | 6.74       | 2.66–17.06              | 0.005*   |
| Sennoside a+b         | 6.34       | 2.74–14.69              | 0.002*   |
| Rabeprazole           | 6.24       | 3.29–11.83              | <.0001** |
| Rebamipide            | 6.06       | 2.95–12.45              | 0.0003*  |
| Simeprevir            | 5.78       | 3.44–9.70               | <.0001** |
| Tacrolimus            | 5.67       | 3.99–8.07               | <.0001** |
| Brotizolam            | 5.63       | 1.97–16.13              | 0.0256*  |
| Insulin glargine      | 5.60       | 3.69–8.49               | <.0001** |
| Lactulose             | 5.57       | 1.95–15.94              | 0.0264*  |
| Lopinavir             | 5.52       | 2.69–11.33              | 0.0005*  |
| Ranolazine            | 5.48       | 2.37–12.69              | 0.0038*  |
| Mycophenolic acid     | 4.98       | 3.15–7.88               | <.0001** |
| Saxagliptin           | 4.32       | 1.71–10.91              | 0.0219*  |
| Abatacept             | 4.01       | 2.19–7.37               | 0.0004*  |
| Sorafenib             | 4.01       | 2.18–7.36               | 0.0004*  |
| Peginterferon alfa-2a | 3.90       | 2.71–5.61               | <.0001** |
| Loxoprofen            | 3.89       | 1.89–7.97               | 0.0038*  |
| Macitentan            | 3.86       | 2.26–6.61               | <.0001** |
| Sirolimus             | 3.86       | 1.53–9.75               | 0.0312*  |
| Glimepiride           | 3.73       | 1.72–8.06               | 0.0091*  |
| Tenofovir             | 3.71       | 2.47–5.58               | <.0001** |
| Pravastatin           | 3.70       | 1.71–8.01               | 0.0094*  |
| Octreotide            | 3.65       | 1.44–9.22               | 0.0371*  |
| Secukinumab           | 3.64       | 1.92–6.89               | 0.0016*  |
| Ascorbic acid         | 3.49       | 1.61–7.55               | 0.0123*  |
| Magnesium oxide       | 3.33       | 1.62–6.83               | 0.0085*  |
| Sitagliptin           | 3.23       | 2.11–4.94               | <.0001** |
| Spirolactone          | 3.15       | 1.81–5.50               | 0.0009*  |
| Ciclosporin           | 3.10       | 1.78–5.41               | 0.001*   |
| Pyridoxine            | 3.04       | 1.32–7.04               | 0.0372*  |
| Dapagliflozin         | 2.92       | 1.35–6.32               | 0.0263*  |
| Somatropin            | 2.79       | 1.29–6.03               | 0.0319*  |
| Infliximab            | 2.47       | 1.54–3.96               | 0.0011*  |
| Bosentan              | 2.33       | 1.31–4.17               | 0.0197*  |
| Lansoprazole          | 2.01       | 1.15–3.51               | 0.0399*  |
| Metformin             | 1.86       | 1.20–2.88               | 0.0143*  |

\*:  $p < 0.05$ , \*\*:  $p < 0.0001$ .

**Table S3.** Molecular initiating events (MIEs) related to liver malignant tumor-inducing drugs.

| AID     | Molecular Initiating Events                          | Activity Type     | ROR  | 95% Confidence Interval | p-Value |
|---------|------------------------------------------------------|-------------------|------|-------------------------|---------|
| 1259396 | Estrogen Receptor- $\beta$                           | antagonist        | 8.08 | 0.91–71.73              | 0.040*  |
| 1259403 | Estrogen Related Receptor                            | antagonist        | 4.65 | 1.72–12.61              | 0.002*  |
| 720552  | p53                                                  | agonist           | 3.85 | 0.94–15.80              | 0.087   |
| 743139  | Aromatase                                            | antagonist        | 3.21 | 0.76–13.60              | 0.155   |
| 720516  | ATAD5                                                | genotoxic inducer | 2.98 | 1.30–6.82               | 0.012*  |
| 1259404 | Estrogen Related Receptor                            | agonist           | 2.96 | 1.33–6.56               | 0.010*  |
| 743241  | Vitamin D Receptor                                   | agonist           | 2.72 | 1.15–6.39               | 0.030*  |
| 1347030 | Thyrotropin Releasing Hormone Receptor               | agonist           | 2.69 | 1.22–5.95               | 0.018*  |
| 743199  | Peroxisome Proliferator-Activated Receptor- $\gamma$ | antagonist        | 2.52 | 1.00–6.36               | 0.060   |
| 1347033 | human Pregnane X Receptor                            | agonist           | 2.40 | 0.83–6.88               | 0.113   |
| 743063  | Androgen Receptor lbd                                | antagonist        | 2.24 | 0.94–5.32               | 0.079   |
| 743228  | Heat Shock Response                                  | activator         | 2.03 | 0.43–9.57               | 0.440   |
| 743091  | Estrogen Receptor- $\alpha$ full                     | antagonist        | 1.91 | 0.85–4.34               | 0.145   |
| 1259387 | Androgen Receptor with antagonist                    | agonist           | 1.89 | 0.82–4.33               | 0.143   |
| 743077  | Estrogen Receptor- $\alpha$ lbd                      | agonist           | 1.87 | 0.86–4.07               | 0.121   |
| 1224894 | Hypoxia (HIF-1)                                      | agonist           | 1.87 | 0.85–4.11               | 0.160   |
| 743054  | Androgen Receptor full                               | antagonist        | 1.80 | 0.67–4.670              | 0.322   |
| 1159531 | Retinoid X Receptor- $\alpha$                        | agonist           | 1.80 | 0.69–4.670              | 0.322   |
| 1347034 | Caspase-3/7 in HepG2                                 | inducer           | 1.78 | 0.82–3.893              | 0.168   |
| 743219  | Antioxidant Response Element                         | agonist           | 1.77 | 0.79–3.98               | 0.213   |
| 743053  | Androgen Receptor lbd                                | agonist           | 1.67 | 0.75–3.71               | 0.226   |
| 1259402 | Estrogen Related Receptor with PGC                   | agonist           | 1.63 | 0.75–3.556              | 0.238   |
| 743122  | Aryl Hydrocarbon Receptor                            | agonist           | 1.63 | 0.65–4.05               | 0.349   |
| 743067  | Thyroid Receptor                                     | antagonist        | 1.61 | 0.71–3.64               | 0.298   |
| 743226  | Peroxisome Proliferator-Activated Receptor- $\delta$ | antagonist        | 1.52 | 0.70–3.32               | 0.325   |
| 743242  | Vitamin D Receptor                                   | antagonist        | 1.47 | 0.09–24.06              | 1.000   |
| 1259391 | Estrogen receptor alpha with antagonist              | agonist           | 1.47 | 0.09–24.06              | 1.000   |
| 1159528 | Activator Protein-1                                  | agonist           | 1.45 | 0.67–3.13               | 0.434   |
| 1259248 | Estrogen Receptor- $\alpha$ with stimulator          | antagonist        | 1.42 | 0.64–3.14               | 0.420   |
| 1259401 | Estrogen Related Receptor with PGC                   | antagonist        | 1.30 | 0.60–2.83               | 0.555   |
| 720719  | Glucocorticoid Receptor                              | agonist           | 1.23 | 0.56–2.72               | 0.688   |

\*:  $p < 0.05$ .

**Table S3.** Molecular initiating events (MIEs) related to liver malignant tumor-inducing drugs (continued).

| AID     | Molecular Initiating Events                          | Activity Type | ROR   | 95% Confidence Interval | <i>p</i> -Value |
|---------|------------------------------------------------------|---------------|-------|-------------------------|-----------------|
| 1159518 | NF- $\kappa$ B                                       | agonist       | 1.156 | 0.40–3.38               | 0.790           |
| 1224893 | Constitutive Androstane Receptor                     | antagonist    | 1.044 | 0.310–3.53              | 1.000           |
| 743140  | Peroxisome Proliferator-Activated Receptor- $\gamma$ | agonist       | 1.027 | 0.45–2.344              | 1.000           |
| 1347032 | Transforming Growth Factor- $\beta$                  | antagonist    | 0.852 | 0.36–2.04               | 0.826           |
| 720725  | Glucocorticoid Receptor                              | antagonist    | 0.707 | 0.17–2.99               | 0.735           |
| 743227  | Peroxisome Proliferator-Activated Receptor- $\delta$ | agonist       | 0.707 | 0.17–2.99               | 0.735           |
| 1347035 | Transforming Growth Factor- $\beta$                  | agonist       | 0.707 | 0.17–2.99               | 0.735           |
| 1224892 | Constitutive Androstane Receptor                     | agonist       | 0.636 | 0.27–1.50               | 0.396           |
| 743240  | Farnesoid-X-Receptor                                 | antagonist    | 0.473 | 0.05–4.70               | 0.644           |
| 1224896 | histone variant H2AX                                 | agonist       | 0.473 | 0.05–4.70               | 0.644           |
| 720637  | Mitochondrial Membrane Potential                     | disruptor     | 0.447 | 0.11–1.76               | 0.353           |
| 743239  | Farnesoid-X-Receptor                                 | agonist       | 0.388 | 0.08–1.96               | 0.305           |
| 1159519 | Endoplasmic Reticulum stress response                | agonist       | 0.349 | 0.04–3.23               | 0.646           |
| 1259247 | Androgen Receptor with stimulator                    | antagonist    | 0.291 | 0.06–1.42               | 0.194           |
| 1259392 | Sonic Hedgehog signaling (Shh)                       | antagonist    | 0.274 | 0.03–2.43               | 0.398           |
| 743078  | Estrogen Receptor- $\alpha$ lbd                      | antagonist    | 0.225 | 0.03–1.94               | 0.237           |
| 1224895 | Thyroid Stimulating Hormone Receptor                 | agonist       | 0     | -                       | 0.269           |
| 1259388 | Histone Decetylase (HDAC)                            | antagonist    | 0     | -                       | 0.078           |
| 1259395 | Thyroid Stimulating Hormone Receptor                 | antagonist    | 0     | -                       | 0.144           |
| 1347031 | Progesterone Receptor                                | antagonist    | 0     | -                       | 1.000           |
| 1347036 | Progesterone Receptor                                | agonist       | 0     | -                       | 0.513           |
| 1347037 | Caspase-3/7 in CHO-K1                                | inducer       | 0     | -                       | 0.079           |
| 1347038 | Thyrotropin Releasing Hormone Receptor               | antagonist    | 0     | -                       | 0.269           |
| 1259390 | Sonic Hedgehog signaling (Shh)                       | agonist       | -     | -                       | -               |
| 1259394 | Estrogen Receptor- $\beta$                           | agonist       | -     | -                       | -               |

\*:  $p < 0.05$ .
