# Supplementary material for: Molecular Initiating Events Associated with Drug-Induced Liver Malignant Tumors: An Integrated Study of the FDA Adverse Event Reporting System and Toxicity Predictions
Source: Biomolecules. 2021 Jun 25;11(7):944. doi: 10.3390/biom11070944 (PMC8301945; doi:10.3390/biom11070944)
Supplement: Supplementary file 1 [file biomolecules-11-00944-s001.zip]

Archive with 4 entries (4 files):
- Supplemental Information.pdf
- Supplemental Results.pdf
- SupplementalMaterial_1_ExampleofAllDataTable.csv
- SupplementalMaterial_2_SMILESandPredictedMIEs.csv
