# Supplementary material for: Molecular Initiating Events Associated with Drug-Induced Liver Malignant Tumors: An Integrated Study of the FDA Adverse Event Reporting System and Toxicity Predictions
Source: Biomolecules. 2021 Jun 25;11(7):944. doi: 10.3390/biom11070944 (PMC8301945; doi:10.3390/biom11070944)
Supplement: Supplementary file 1 [file biomolecules-11-00944-s001.zip › SupplementalMaterial_1_ExampleofAllDataTable.csv]

primaryID	REAC_PT	LMTbin	GenericNames	drug_seq	INDI_PT	event_dt	start_dt	end_dt	event_dt_JMP	start_dt_JMP	end_dt_JMP
4276922	ASPERGILLOSIS	0	VORICONAZOLE	1004569567	ASPERGILLOSIS	20040101	20040101	20040101	2004/1/1	2004/1/1	2004/1/1
4276922	DRUG INTERACTION	0	VORICONAZOLE	1004569567	ASPERGILLOSIS	20040101	20040101	20040101	2004/1/1	2004/1/1	2004/1/1
4276922	HALLUCINATION	0	VORICONAZOLE	1004569567	ASPERGILLOSIS	20040101	20040101	20040101	2004/1/1	2004/1/1	2004/1/1
4279745	GASTROINTESTINAL ULCER HAEMORRHAGE	0	ROFECOXIB	1004560814	PAIN IN EXTREMITY	20040101	20040101	20040101	2004/1/1	2004/1/1	2004/1/1
4279745	HELICOBACTER PYLORI IDENTIFICATION TEST POSITIVE	0	ROFECOXIB	1004560814	PAIN IN EXTREMITY	20040101	20040101	20040101	2004/1/1	2004/1/1	2004/1/1
4284756	CARDIAC ARREST	0	AMPICILLIN	1004583924	ILL-DEFINED DISORDER	20040101	20040101	20040101	2004/1/1	2004/1/1	2004/1/1
4284756	CARDIOVASCULAR DISORDER	0	AMPICILLIN	1004583924	ILL-DEFINED DISORDER	20040101	20040101	20040101	2004/1/1	2004/1/1	2004/1/1
4284756	DRUG HYPERSENSITIVITY	0	AMPICILLIN	1004583924	ILL-DEFINED DISORDER	20040101	20040101	20040101	2004/1/1	2004/1/1	2004/1/1
4284756	CARDIAC ARREST	0	SULBACTAM	1004583924	ILL-DEFINED DISORDER	20040101	20040101	20040101	2004/1/1	2004/1/1	2004/1/1
4284756	CARDIOVASCULAR DISORDER	0	SULBACTAM	1004583924	ILL-DEFINED DISORDER	20040101	20040101	20040101	2004/1/1	2004/1/1	2004/1/1
4284756	DRUG HYPERSENSITIVITY	0	SULBACTAM	1004583924	ILL-DEFINED DISORDER	20040101	20040101	20040101	2004/1/1	2004/1/1	2004/1/1
4286205	CONDITION AGGRAVATED	0	PAROXETINE	1004590299	DEPRESSION	20040109	20040109	20040202	2004/1/9	2004/1/9	2004/2/2
4286205	NIGHTMARE	0	PAROXETINE	1004590299	DEPRESSION	20040109	20040109	20040202	2004/1/9	2004/1/9	2004/2/2
4286205	PHARMACEUTICAL PRODUCT COMPLAINT	0	PAROXETINE	1004590299	DEPRESSION	20040109	20040109	20040202	2004/1/9	2004/1/9	2004/2/2
4286205	CONDITION AGGRAVATED	0	PAROXETINE	1004590299	NIGHTMARE	20040109	20040109	20040202	2004/1/9	2004/1/9	2004/2/2
4286205	NIGHTMARE	0	PAROXETINE	1004590299	NIGHTMARE	20040109	20040109	20040202	2004/1/9	2004/1/9	2004/2/2
4286205	PHARMACEUTICAL PRODUCT COMPLAINT	0	PAROXETINE	1004590299	NIGHTMARE	20040109	20040109	20040202	2004/1/9	2004/1/9	2004/2/2
4286235	DRUG EFFECT DECREASED	0	MIDAZOLAM	1004590369	SEDATION	20040126	20040126	20040127	2004/1/26	2004/1/26	2004/1/27
4288826	CONFUSIONAL STATE	0	CELECOXIB	1004600192	PAIN	20040105	20040102	20040106	2004/1/5	2004/1/2	2004/1/6
4288826	DYSPNOEA	0	CELECOXIB	1004600192	PAIN	20040105	20040102	20040106	2004/1/5	2004/1/2	2004/1/6
4288826	GENERAL PHYSICAL HEALTH DETERIORATION	0	CELECOXIB	1004600192	PAIN	20040105	20040102	20040106	2004/1/5	2004/1/2	2004/1/6
4288826	HYPOVOLAEMIA	0	CELECOXIB	1004600192	PAIN	20040105	20040102	20040106	2004/1/5	2004/1/2	2004/1/6
4288826	INAPPROPRIATE ANTIDIURETIC HORMONE SECRETION	0	CELECOXIB	1004600192	PAIN	20040105	20040102	20040106	2004/1/5	2004/1/2	2004/1/6
4288826	INFLAMMATION	0	CELECOXIB	1004600192	PAIN	20040105	20040102	20040106	2004/1/5	2004/1/2	2004/1/6
4288826	LUNG INFILTRATION	0	CELECOXIB	1004600192	PAIN	20040105	20040102	20040106	2004/1/5	2004/1/2	2004/1/6
4288826	PYREXIA	0	CELECOXIB	1004600192	PAIN	20040105	20040102	20040106	2004/1/5	2004/1/2	2004/1/6
4288826	TACHYPNOEA	0	CELECOXIB	1004600192	PAIN	20040105	20040102	20040106	2004/1/5	2004/1/2	2004/1/6
4289329	BLOOD PRESSURE INCREASED	0	HYDROCORTISONE	1004602187	CHILLS	20040101	20040101	20040101	2004/1/1	2004/1/1	2004/1/1
4289329	DEPRESSED LEVEL OF CONSCIOUSNESS	0	HYDROCORTISONE	1004602187	CHILLS	20040101	20040101	20040101	2004/1/1	2004/1/1	2004/1/1
4289329	RESPIRATION ABNORMAL	0	HYDROCORTISONE	1004602187	CHILLS	20040101	20040101	20040101	2004/1/1	2004/1/1	2004/1/1
4289329	TACHYCARDIA	0	HYDROCORTISONE	1004602187	CHILLS	20040101	20040101	20040101	2004/1/1	2004/1/1	2004/1/1
4290280	DYSTONIA	0	ARIPIPRAZOLE	1004604648	SCHIZOPHRENIA	20040204	20040202	20040204	2004/2/4	2004/2/2	2004/2/4
4292039	DEVICE FAILURE	0	ALBUMIN HUMAN	1004609218	SURGERY	20040112	20040112	20040112	2004/1/12	2004/1/12	2004/1/12
4292039	PHARMACEUTICAL PRODUCT COMPLAINT	0	ALBUMIN HUMAN	1004609218	SURGERY	20040112	20040112	20040112	2004/1/12	2004/1/12	2004/1/12
4292039	DEVICE FAILURE	0	ALBUMIN HUMAN	1004627137	SURGERY	20040112	20040112	20040112	2004/1/12	2004/1/12	2004/1/12
4292039	PHARMACEUTICAL PRODUCT COMPLAINT	0	ALBUMIN HUMAN	1004627137	SURGERY	20040112	20040112	20040112	2004/1/12	2004/1/12	2004/1/12
4292501	HYPOGLYCAEMIA	0	GATIFLOXACIN	1004610366	PNEUMONIA	20040104	20040103	20040104	2004/1/4	2004/1/3	2004/1/4
4292501	PNEUMONIA	0	GATIFLOXACIN	1004610366	PNEUMONIA	20040104	20040103	20040104	2004/1/4	2004/1/3	2004/1/4
4292572	DRUG INEFFECTIVE	0	MORPHINE	1004610510	POST PROCEDURAL PAIN	20040206	20040101	20040206	2004/2/6	2004/1/1	2004/2/6
4293185	ANAESTHETIC COMPLICATION	0	TETRACAINE	1004612943	ANAESTHESIA	20040101	20040101	20040101	2004/1/1	2004/1/1	2004/1/1
4293185	COMPLICATIONS OF MATERNAL EXPOSURE TO THERAPEUTIC DRUGS	0	TETRACAINE	1004612943	ANAESTHESIA	20040101	20040101	20040101	2004/1/1	2004/1/1	2004/1/1
4293185	DYSPNOEA	0	TETRACAINE	1004612943	ANAESTHESIA	20040101	20040101	20040101	2004/1/1	2004/1/1	2004/1/1
4293185	PARAESTHESIA	0	TETRACAINE	1004612943	ANAESTHESIA	20040101	20040101	20040101	2004/1/1	2004/1/1	2004/1/1
4293187	DYSPNOEA	0	TETRACAINE	1004612952	ANAESTHESIA	20040101	20040101	20040101	2004/1/1	2004/1/1	2004/1/1
4293187	PARAESTHESIA	0	TETRACAINE	1004612952	ANAESTHESIA	20040101	20040101	20040101	2004/1/1	2004/1/1	2004/1/1
4293630	HICCUPS	0	RISPERIDONE	1004614121	PSYCHOTIC DISORDER	20040110	20040110	20040124	2004/1/10	2004/1/10	2004/1/24
4294748	CONVULSION	0	INTERFERON ALFACON-1	1004619087	HEPATITIS C	20040123	20040101	20040123	2004/1/23	2004/1/1	2004/1/23
4294748	DEPRESSED LEVEL OF CONSCIOUSNESS	0	INTERFERON ALFACON-1	1004619087	HEPATITIS C	20040123	20040101	20040123	2004/1/23	2004/1/1	2004/1/23
4299198	HYPOTENSION	0	PROTAMINE	1004634271	COAGULATION TIME PROLONGED	20040129	20040129	20040129	2004/1/29	2004/1/29	2004/1/29
4299591	ABDOMINAL PAIN UPPER	0	CLARITHROMYCIN	1004635299	UPPER RESPIRATORY TRACT INFECTION	20040101	20040101	20040101	2004/1/1	2004/1/1	2004/1/1
4299591	BLOOD AMYLASE INCREASED	0	CLARITHROMYCIN	1004635299	UPPER RESPIRATORY TRACT INFECTION	20040101	20040101	20040101	2004/1/1	2004/1/1	2004/1/1
4299591	PYREXIA	0	CLARITHROMYCIN	1004635299	UPPER RESPIRATORY TRACT INFECTION	20040101	20040101	20040101	2004/1/1	2004/1/1	2004/1/1
4299985	CHEST DISCOMFORT	0	RAMIPRIL	1004637573	HYPERTENSION	20040121	20040115	20040123	2004/1/21	2004/1/15	2004/1/23
4299985	DYSPNOEA	0	RAMIPRIL	1004637573	HYPERTENSION	20040121	20040115	20040123	2004/1/21	2004/1/15	2004/1/23
4299985	TACHYCARDIA	0	RAMIPRIL	1004637573	HYPERTENSION	20040121	20040115	20040123	2004/1/21	2004/1/15	2004/1/23
4300036	DEATH	0	IMATINIB	1004637673	GASTROINTESTINAL STROMAL TUMOUR	20040101	20040101	20040101	2004/1/1	2004/1/1	2004/1/1
4300036	MALIGNANT NEOPLASM PROGRESSION	0	IMATINIB	1004637673	GASTROINTESTINAL STROMAL TUMOUR	20040101	20040101	20040101	2004/1/1	2004/1/1	2004/1/1
4300036	NAUSEA	0	IMATINIB	1004637673	GASTROINTESTINAL STROMAL TUMOUR	20040101	20040101	20040101	2004/1/1	2004/1/1	2004/1/1
4300036	REFUSAL OF TREATMENT BY PATIENT	0	IMATINIB	1004637673	GASTROINTESTINAL STROMAL TUMOUR	20040101	20040101	20040101	2004/1/1	2004/1/1	2004/1/1
4300036	VOMITING	0	IMATINIB	1004637673	GASTROINTESTINAL STROMAL TUMOUR	20040101	20040101	20040101	2004/1/1	2004/1/1	2004/1/1
4300188	HEPATITIS CHOLESTATIC	0	SEVOFLURANE	1004638235	ANAESTHESIA	20040101	20040101	20040101	2004/1/1	2004/1/1	2004/1/1
4300461	HAEMORRHAGE INTRACRANIAL	0	INDOMETACIN	1004638935	PATENT DUCTUS ARTERIOSUS	20040121	20040120	20040121	2004/1/21	2004/1/20	2004/1/21
4300461	PULMONARY HAEMORRHAGE	0	INDOMETACIN	1004638935	PATENT DUCTUS ARTERIOSUS	20040121	20040120	20040121	2004/1/21	2004/1/20	2004/1/21
4300741	CHILLS	0	TUBERCULIN	1004639586	TUBERCULIN TEST	20040204	20040203	20040204	2004/2/4	2004/2/3	2004/2/4
4300741	ERYTHEMA	0	TUBERCULIN	1004639586	TUBERCULIN TEST	20040204	20040203	20040204	2004/2/4	2004/2/3	2004/2/4
4300741	HEADACHE	0	TUBERCULIN	1004639586	TUBERCULIN TEST	20040204	20040203	20040204	2004/2/4	2004/2/3	2004/2/4
4300741	INDURATION	0	TUBERCULIN	1004639586	TUBERCULIN TEST	20040204	20040203	20040204	2004/2/4	2004/2/3	2004/2/4
4300741	NAUSEA	0	TUBERCULIN	1004639586	TUBERCULIN TEST	20040204	20040203	20040204	2004/2/4	2004/2/3	2004/2/4
4300741	PAIN	0	TUBERCULIN	1004639586	TUBERCULIN TEST	20040204	20040203	20040204	2004/2/4	2004/2/3	2004/2/4
4300741	PHARMACEUTICAL PRODUCT COMPLAINT	0	TUBERCULIN	1004639586	TUBERCULIN TEST	20040204	20040203	20040204	2004/2/4	2004/2/3	2004/2/4
4300741	PRURITUS	0	TUBERCULIN	1004639586	TUBERCULIN TEST	20040204	20040203	20040204	2004/2/4	2004/2/3	2004/2/4
4300741	VOMITING	0	TUBERCULIN	1004639586	TUBERCULIN TEST	20040204	20040203	20040204	2004/2/4	2004/2/3	2004/2/4
4311016	PANCYTOPENIA	0	LINEZOLID	1004676583	OSTEOMYELITIS	20040211	20040115	20040211	2004/2/11	2004/1/15	2004/2/11
4300953	FATIGUE	0	ERYTHROMYCIN	1004640239	PNEUMONIA	20040118	20040116	20040119	2004/1/18	2004/1/16	2004/1/19
4300953	SUPRAVENTRICULAR TACHYCARDIA	0	ERYTHROMYCIN	1004640239	PNEUMONIA	20040118	20040116	20040119	2004/1/18	2004/1/16	2004/1/19
4301270	DEHYDRATION	0	MORPHINE	1004641599	BACK DISORDER	20040209	20040203	20040213	2004/2/9	2004/2/3	2004/2/13
4301270	ELECTROLYTE IMBALANCE	0	MORPHINE	1004641599	BACK DISORDER	20040209	20040203	20040213	2004/2/9	2004/2/3	2004/2/13
4301270	NAUSEA	0	MORPHINE	1004641599	BACK DISORDER	20040209	20040203	20040213	2004/2/9	2004/2/3	2004/2/13
4301270	RENAL FAILURE	0	MORPHINE	1004641599	BACK DISORDER	20040209	20040203	20040213	2004/2/9	2004/2/3	2004/2/13
4301270	VOMITING	0	MORPHINE	1004641599	BACK DISORDER	20040209	20040203	20040213	2004/2/9	2004/2/3	2004/2/13
4301997	ASTHENIA	0	OMEPRAZOLE	1004669225	HYPERCHLORHYDRIA	20040126	20040126	20040129	2004/1/26	2004/1/26	2004/1/29
4301997	DIZZINESS	0	OMEPRAZOLE	1004669225	HYPERCHLORHYDRIA	20040126	20040126	20040129	2004/1/26	2004/1/26	2004/1/29
4301997	DRUG INTERACTION	0	OMEPRAZOLE	1004669225	HYPERCHLORHYDRIA	20040126	20040126	20040129	2004/1/26	2004/1/26	2004/1/29
4301997	DYSPEPSIA	0	OMEPRAZOLE	1004669225	HYPERCHLORHYDRIA	20040126	20040126	20040129	2004/1/26	2004/1/26	2004/1/29
4301997	NAUSEA	0	OMEPRAZOLE	1004669225	HYPERCHLORHYDRIA	20040126	20040126	20040129	2004/1/26	2004/1/26	2004/1/29
4301997	OVERDOSE	0	OMEPRAZOLE	1004669225	HYPERCHLORHYDRIA	20040126	20040126	20040129	2004/1/26	2004/1/26	2004/1/29
4302553	LOCAL SWELLING	0	AMIFOSTINE	1004645635	RADIOTHERAPY	20040102	20040102	20040102	2004/1/2	2004/1/2	2004/1/2
4302553	MYOSITIS	0	AMIFOSTINE	1004645635	RADIOTHERAPY	20040102	20040102	20040102	2004/1/2	2004/1/2	2004/1/2
4303549	DRUG INTERACTION	0	VORICONAZOLE	1004649419	ILL-DEFINED DISORDER	20040101	20040101	20040101	2004/1/1	2004/1/1	2004/1/1
4303549	HYPOGLYCAEMIC COMA	0	VORICONAZOLE	1004649419	ILL-DEFINED DISORDER	20040101	20040101	20040101	2004/1/1	2004/1/1	2004/1/1
4303661	MENINGITIS ASEPTIC	0	LAMOTRIGINE	1004664542	CONVULSION	20040206	20040206	20040209	2004/2/6	2004/2/6	2004/2/9
4304547	CONVULSION	0	ERTAPENEM	1004654081	ABSCESS	20040221	20040214	20040221	2004/2/21	2004/2/14	2004/2/21
4304586	DRUG INEFFECTIVE	0	PHENTERMINE	1004654244	WEIGHT DECREASED	20040213	20040113	20040213	2004/2/13	2004/1/13	2004/2/13
4307556	FATIGUE	0	PEGVISOMANT	1004664277	ACROMEGALY	20040205	20040122	20040207	2004/2/5	2004/1/22	2004/2/7
4307556	INJECTION SITE ERYTHEMA	0	PEGVISOMANT	1004664277	ACROMEGALY	20040205	20040122	20040207	2004/2/5	2004/1/22	2004/2/7
4307556	INJECTION SITE PRURITUS	0	PEGVISOMANT	1004664277	ACROMEGALY	20040205	20040122	20040207	2004/2/5	2004/1/22	2004/2/7
4307556	INJECTION SITE REACTION	0	PEGVISOMANT	1004664277	ACROMEGALY	20040205	20040122	20040207	2004/2/5	2004/1/22	2004/2/7
4307556	INJECTION SITE WARMTH	0	PEGVISOMANT	1004664277	ACROMEGALY	20040205	20040122	20040207	2004/2/5	2004/1/22	2004/2/7
4307609	BODY TEMPERATURE INCREASED	0	GEMCITABINE	1004664467	METASTATIC NEOPLASM	20040223	20040217	20040224	2004/2/23	2004/2/17	2004/2/24
4307609	CHROMATURIA	0	GEMCITABINE	1004664467	METASTATIC NEOPLASM	20040223	20040217	20040224	2004/2/23	2004/2/17	2004/2/24
